# Supplementary material for: The role of aerosols and greenhouse gases in Sahel drought and recovery
Source: Springer Nature journal article supplement (doi:10.1007/s10584-018-2341-9), 2018-12-06
Supplement: 10584_2018_2341_MOESM1_ESM.pdf [file 10584_2018_2341_MOESM1_ESM.pdf]

## **The role of aerosols and greenhouse gases in Sahel drought and recovery: Supplementary material**

**Alessandra Giannini · Alexey Kaplan**

Received: 27 May 2018 / Accepted: 12 November 2018

---

A. Giannini  
International Research Institute for Climate and Society, Earth Institute at Columbia University, 61 Rt 9W, Palisades NY 10964, U.S.A.

A. Kaplan  
Lamont-Doherty Earth Observatory, Earth Institute at Columbia University, 61 Rt 9W, Palisades NY 10964, U.S.A.

## Supplementary Material

**Table S1:** Predictors' space characteristics and linear regression results for Sahel rainfall from each individual model's ensemble mean in CMIP5 pre-Industrial control simulations. Columns from left to right show model name, the correlation coefficient,  $\rho$ , of the original predictors ( $x_1$  =GT, global tropical SST mean, and  $x_2$  =NA, sub-tropical North Atlantic SST mean—see Section 1 for the exact definition of these indices), the ratio of their standard deviations,  $k = \sigma_1/\sigma_2$ , angle  $\phi$  from Eq. (3), in arc degree, the relative variance of the trailing mode,  $\lambda_2/(\lambda_1 + \lambda_2)$ , bivariate regression coefficients  $a$  and  $b$  of Sahel rainfall  $y$  (see Section 2 for an exact definition) on the SVD-based predictors  $p_1$  and  $p_2$ , obtained from the original predictors  $x_1$  and  $x_2$ , as described in Eqs. (1)-(4) (see Sections 5.1-5.2 in the Appendix for an explanation and derivations), and the correlation coefficient between  $y$ , Sahel rainfall as simulated in CMIP5, and its predicted values from regression model (6):  $\hat{y} = ap_1 + bp_2$ . Models highlighted in bold font are those whose value in the rightmost column is greater than 0.45, representing 20% of the total variance. Multi-model mean results are included in the last line of the table.

**Table S2:** same as in Table S1, but for the CMIP5 twentieth century/historical simulations. The second column from the left reports the ensemble size.

**Table S3:** same as in Table S1, but for the CMIP5 twenty-first century/RCP8.5 simulations. The second column from the left reports the ensemble size.

**Table S1**

| CMIP5/PI-control<br>pre-industrial | $\rho$       | $k$          | $\phi$ ,<br>arc ° | $\lambda_2/(\lambda_1 + \lambda_2)$ ,<br>% | $a$           | $b$          | Correlation<br>coefficient<br>of $y$ , $\hat{y}$ |
|------------------------------------|--------------|--------------|-------------------|--------------------------------------------|---------------|--------------|--------------------------------------------------|
| ACCESS1-0                          | 0.188        | 0.946        | 53.18             | 40.23                                      | -0.235        | 0.164        | 0.286                                            |
| ACCESS1-3                          | 0.228        | 1.027        | 41.66             | 38.55                                      | -0.312        | 0.283        | 0.421                                            |
| bcc-csm1-1                         | 0.173        | 0.589        | 81.31             | 24.62                                      | -0.004        | -0.168       | 0.168                                            |
| <b>BNU-ESM</b>                     | <b>0.317</b> | <b>1.078</b> | <b>38.33</b>      | <b>33.75</b>                               | <b>-0.404</b> | <b>0.244</b> | <b>0.472</b>                                     |
| CanESM2                            | 0.357        | 0.939        | 49.99             | 31.92                                      | -0.289        | 0.264        | 0.391                                            |
| <b>CCSM4</b>                       | <b>0.479</b> | <b>1.162</b> | <b>36.25</b>      | <b>25.17</b>                               | <b>-0.360</b> | <b>0.380</b> | <b>0.523</b>                                     |
| <b>CESM1-CAM5</b>                  | <b>0.380</b> | <b>0.873</b> | <b>54.88</b>      | <b>30.01</b>                               | <b>-0.207</b> | <b>0.610</b> | <b>0.644</b>                                     |
| CMCC-CM                            | 0.316        | 0.778        | 64.35             | 30.37                                      | 0.141         | -0.047       | 0.149                                            |
| CNRM-CM5                           | 0.320        | 0.599        | 74.57             | 22.48                                      | 0.136         | -0.083       | 0.159                                            |
| CSIRO-Mk3-6-0                      | 0.440        | 0.922        | 50.23             | 27.69                                      | 0.138         | 0.073        | 0.156                                            |
| <b>FGOALS-g2</b>                   | <b>0.177</b> | <b>0.952</b> | <b>52.81</b>      | <b>40.81</b>                               | <b>-0.244</b> | <b>0.448</b> | <b>0.511</b>                                     |
| FIO-ESM                            | 0.266        | 1.292        | 22.90             | 32.01                                      | -0.051        | -0.166       | 0.173                                            |
| GFDL-CM3                           | 0.460        | 0.951        | 48.10             | 26.87                                      | 0.358         | 0.067        | 0.364                                            |
| GFDL-ESM2G                         | 0.132        | 0.824        | 72.91             | 38.47                                      | 0.185         | 0.215        | 0.284                                            |
| GFDL-ESM2M                         | 0.348        | 1.156        | 33.66             | 31.33                                      | -0.202        | 0.141        | 0.246                                            |
| GISS-E2-H                          | -0.067       | 0.989        | 130.18            | 46.62                                      | -0.155        | 0.042        | 0.160                                            |
| GISS-E2-R                          | 0.141        | 0.745        | 77.38             | 34.16                                      | 0.180         | -0.188       | 0.261                                            |
| <b>HadGEM2-CC</b>                  | <b>0.007</b> | <b>0.580</b> | <b>89.63</b>      | <b>25.20</b>                               | <b>0.175</b>  | <b>0.533</b> | <b>0.561</b>                                     |
| <b>HadGEM2-ES</b>                  | <b>0.107</b> | <b>0.688</b> | <b>82.14</b>      | <b>31.47</b>                               | <b>0.062</b>  | <b>0.458</b> | <b>0.462</b>                                     |
| inmcm4                             | 0.300        | 0.888        | 55.85             | 33.95                                      | -0.163        | 0.301        | 0.342                                            |
| IPSL-CM5A-LR                       | 0.423        | 0.666        | 67.32             | 22.59                                      | 0.078         | 0.250        | 0.262                                            |
| IPSL-CM5A-MR                       | 0.452        | 0.785        | 59.21             | 25.02                                      | -0.097        | 0.426        | 0.437                                            |
| IPSL-CM5B-LR                       | 0.398        | 0.467        | 77.29             | 14.47                                      | 0.134         | -0.264       | 0.297                                            |
| MIROC-ESM                          | 0.180        | 0.668        | 78.23             | 29.15                                      | -0.040        | 0.229        | 0.232                                            |
| <b>MIROC5</b>                      | <b>0.393</b> | <b>1.302</b> | <b>27.90</b>      | <b>27.04</b>                               | <b>-0.533</b> | <b>0.229</b> | <b>0.580</b>                                     |
| MPI-ESM-LR                         | 0.357        | 1.074        | 39.36             | 31.82                                      | -0.369        | 0.253        | 0.447                                            |
| MPI-ESM-MR                         | 0.342        | 0.857        | 57.17             | 31.45                                      | -0.241        | 0.312        | 0.394                                            |
| MRI-CGCM3                          | 0.115        | 0.519        | 85.34             | 20.85                                      | 0.152         | 0.043        | 0.158                                            |
| NorESM1-M                          | 0.352        | 0.964        | 47.99             | 32.30                                      | -0.110        | 0.197        | 0.226                                            |
| <i>Multi-model mean</i>            | <i>0.369</i> | <i>0.771</i> | <i>62.75</i>      | <i>28.10</i>                               | <i>0.054</i>  | <i>0.312</i> | <i>0.317</i>                                     |

Table S2

| CMIP5/historical<br>[1900-1999] | ens<br>size | $\rho$       | $k$          | $\phi$ ,<br>arc ° | $\lambda_2/(\lambda_1 + \lambda_2)$ ,<br>% | $a$           | $b$          | Correlation<br>coefficient<br>of $y$ , $\hat{y}$ |
|---------------------------------|-------------|--------------|--------------|-------------------|--------------------------------------------|---------------|--------------|--------------------------------------------------|
| ACCESS1-0                       | 1           | 0.303        | 0.735        | 67.97             | 29.22                                      | -0.040        | 0.190        | 0.194                                            |
| ACCESS1-3                       | 1           | 0.299        | 0.908        | 53.96             | 34.36                                      | -0.087        | 0.223        | 0.240                                            |
| bcc-csm1-1                      | 3           | 0.759        | 1.054        | 43.00             | 11.99                                      | -0.015        | 0.289        | 0.290                                            |
| BNU-ESM                         | 1           | 0.553        | 1.144        | 38.13             | 21.80                                      | -0.213        | 0.257        | 0.334                                            |
| <b>CanESM2</b>                  | <b>5</b>    | <b>0.758</b> | <b>1.186</b> | <b>38.63</b>      | <b>11.72</b>                               | <b>-0.188</b> | <b>0.442</b> | <b>0.480</b>                                     |
| <b>CCSM4</b>                    | <b>6</b>    | <b>0.920</b> | <b>1.211</b> | <b>39.10</b>      | <b>3.85</b>                                | <b>-0.367</b> | <b>0.488</b> | <b>0.610</b>                                     |
| <b>CESM1-CAM5</b>               | <b>3</b>    | <b>0.621</b> | <b>1.086</b> | <b>41.19</b>      | <b>18.78</b>                               | <b>-0.214</b> | <b>0.473</b> | <b>0.520</b>                                     |
| CMCC-CM                         | 1           | 0.322        | 1.027        | 42.60             | 33.85                                      | -0.084        | -0.112       | 0.140                                            |
| CNRM-CM5                        | 10          | 0.817        | 0.779        | 53.57             | 8.54                                       | 0.221         | 0.242        | 0.328                                            |
| CSIRO-Mk3-6-0                   | 10          | 0.765        | 0.884        | 49.59             | 11.56                                      | -0.051        | 0.098        | 0.111                                            |
| FGOALS-g2                       | 5           | 0.881        | 1.150        | 40.48             | 5.83                                       | -0.190        | 0.284        | 0.341                                            |
| FIO-ESM                         | 3           | 0.749        | 1.276        | 35.91             | 11.72                                      | 0.040         | 0.267        | 0.270                                            |
| GFDL-CM3                        | 4           | 0.732        | 0.847        | 51.41             | 13.00                                      | 0.297         | 0.334        | 0.447                                            |
| GFDL-ESM2G                      | 1           | 0.488        | 0.952        | 47.90             | 25.50                                      | -0.244        | 0.300        | 0.386                                            |
| GFDL-ESM2M                      | 1           | 0.389        | 1.203        | 32.24             | 28.82                                      | -0.192        | -0.006       | 0.192                                            |
| <b>GISS-E2-H</b>                | <b>5</b>    | <b>0.856</b> | <b>1.278</b> | <b>36.92</b>      | <b>6.77</b>                                | <b>-0.334</b> | <b>0.422</b> | <b>0.538</b>                                     |
| <b>GISS-E2-R</b>                | <b>5</b>    | <b>0.826</b> | <b>1.197</b> | <b>38.83</b>      | <b>8.39</b>                                | <b>-0.316</b> | <b>0.360</b> | <b>0.479</b>                                     |
| HadGEM2-CC                      | 1           | 0.304        | 0.640        | 73.29             | 24.94                                      | 0.142         | 0.323        | 0.353                                            |
| HadGEM2-ES                      | 4           | 0.439        | 0.554        | 72.46             | 17.61                                      | 0.297         | 0.285        | 0.411                                            |
| inmcm4                          | 1           | 0.621        | 1.020        | 44.08             | 18.96                                      | -0.180        | 0.135        | 0.225                                            |
| <b>IPSL-CM5A-LR</b>             | <b>5</b>    | <b>0.901</b> | <b>0.806</b> | <b>51.80</b>      | <b>4.72</b>                                | <b>-0.289</b> | <b>0.395</b> | <b>0.489</b>                                     |
| <b>IPSL-CM5A-MR</b>             | <b>1</b>    | <b>0.675</b> | <b>0.982</b> | <b>45.77</b>      | <b>16.23</b>                               | <b>-0.249</b> | <b>0.431</b> | <b>0.498</b>                                     |
| IPSL-CM5B-LR                    | 1           | 0.592        | 0.616        | 65.20             | 15.28                                      | 0.223         | -0.180       | 0.286                                            |
| <b>MIROC-ESM</b>                | <b>3</b>    | <b>0.462</b> | <b>1.065</b> | <b>41.11</b>      | <b>26.75</b>                               | <b>-0.295</b> | <b>0.467</b> | <b>0.552</b>                                     |
| <b>MIROC5</b>                   | <b>5</b>    | <b>0.718</b> | <b>1.027</b> | <b>43.95</b>      | <b>14.11</b>                               | <b>-0.228</b> | <b>0.593</b> | <b>0.635</b>                                     |
| MPI-ESM-LR                      | 3           | 0.826        | 0.833        | 51.29             | 8.40                                       | 0.072         | 0.373        | 0.380                                            |
| MPI-ESM-MR                      | 3           | 0.810        | 0.890        | 49.12             | 9.38                                       | 0.284         | 0.137        | 0.316                                            |
| <b>MRI-CGCM3</b>                | <b>3</b>    | <b>0.615</b> | <b>0.670</b> | <b>61.89</b>      | <b>15.81</b>                               | <b>0.403</b>  | <b>0.365</b> | <b>0.544</b>                                     |
| NorESM1-M                       | 3           | 0.747        | 0.936        | 47.53             | 12.58                                      | -0.162        | 0.248        | 0.296                                            |
| <b>Multi-model mean</b>         | <b>29</b>   | <b>0.955</b> | <b>1.054</b> | <b>43.42</b>      | <b>2.26</b>                                | <b>-0.320</b> | <b>0.477</b> | <b>0.574</b>                                     |

**Table S3**

| CMIP5/RCP8.5<br>[2006-2099] | ens<br>size | $\rho$       | $k$          | $\phi$ ,<br>arc ° | $\lambda_2/(\lambda_1 + \lambda_2)$ ,<br>% | $a$           | $b$          | Correlation<br>coefficient<br>of $y, \hat{y}$ |
|-----------------------------|-------------|--------------|--------------|-------------------|--------------------------------------------|---------------|--------------|-----------------------------------------------|
| ACCESS1-0                   | 1           | 0.974        | 1.104        | 42.09             | 1.27                                       | 0.186         | 0.196        | 0.270                                         |
| ACCESS1-3                   | 1           | 0.982        | 1.112        | 41.91             | 0.87                                       | 0.088         | 0.070        | 0.112                                         |
| bcc-csm1-1                  | 1           | 0.959        | 1.051        | 43.51             | 2.07                                       | -0.101        | 0.142        | 0.174                                         |
| <b>BNU-ESM</b>              | <b>1</b>    | <b>0.960</b> | <b>0.911</b> | <b>47.78</b>      | <b>2.00</b>                                | <b>0.639</b>  | <b>0.309</b> | <b>0.709</b>                                  |
| CanESM2                     | 5           | 0.994        | 1.069        | 43.07             | 0.29                                       | 0.173         | 0.236        | 0.292                                         |
| <b>CCSM4</b>                | <b>6</b>    | <b>0.994</b> | <b>1.150</b> | <b>40.98</b>      | <b>0.32</b>                                | <b>0.613</b>  | <b>0.081</b> | <b>0.619</b>                                  |
| CESM1-CAM5                  | 3           | 0.991        | 1.173        | 40.42             | 0.41                                       | 0.188         | 0.392        | 0.435                                         |
| CMCC-CM                     | 1           | 0.978        | 1.031        | 44.12             | 1.08                                       | -0.147        | 0.216        | 0.262                                         |
| <b>CNRM-CM5</b>             | <b>5</b>    | <b>0.990</b> | <b>0.978</b> | <b>45.63</b>      | <b>0.49</b>                                | <b>0.520</b>  | <b>0.105</b> | <b>0.531</b>                                  |
| <b>CSIRO-Mk3-6-0</b>        | <b>10</b>   | <b>0.997</b> | <b>1.089</b> | <b>42.54</b>      | <b>0.13</b>                                | <b>-0.933</b> | <b>0.078</b> | <b>0.936</b>                                  |
| <b>FGOALS-g2</b>            | <b>1</b>    | <b>0.976</b> | <b>0.683</b> | <b>55.89</b>      | <b>1.04</b>                                | <b>0.707</b>  | <b>0.169</b> | <b>0.727</b>                                  |
| FIO-ESM                     | 3           | 0.965        | 1.624        | 31.21             | 1.37                                       | -0.134        | 0.121        | 0.181                                         |
| <b>GFDL-CM3</b>             | <b>1</b>    | <b>0.984</b> | <b>0.935</b> | <b>46.97</b>      | <b>0.82</b>                                | <b>0.607</b>  | <b>0.259</b> | <b>0.660</b>                                  |
| GFDL-ESM2G                  | 1           | 0.951        | 0.948        | 46.62             | 2.45                                       | -0.224        | 0.007        | 0.225                                         |
| GFDL-ESM2M                  | 1           | 0.945        | 0.975        | 45.76             | 2.76                                       | -0.232        | -0.025       | 0.233                                         |
| GISS-E2-H                   | 1           | 0.971        | 1.125        | 41.53             | 1.42                                       | -0.314        | 0.305        | 0.438                                         |
| <b>GISS-E2-R</b>            | <b>2</b>    | <b>0.973</b> | <b>1.236</b> | <b>38.82</b>      | <b>1.30</b>                                | <b>-0.556</b> | <b>0.318</b> | <b>0.640</b>                                  |
| HadGEM2-CC                  | 3           | 0.978        | 1.074        | 42.90             | 1.11                                       | 0.252         | 0.300        | 0.391                                         |
| HadGEM2-ES                  | 4           | 0.989        | 1.118        | 41.76             | 0.56                                       | -0.084        | 0.366        | 0.375                                         |
| inmcm4                      | 1           | 0.967        | 1.036        | 43.96             | 1.65                                       | -0.001        | 0.085        | 0.085                                         |
| IPSL-CM5A-LR                | 4           | 0.995        | 1.085        | 42.64             | 0.24                                       | -0.089        | 0.293        | 0.306                                         |
| IPSL-CM5A-MR                | 1           | 0.982        | 1.116        | 41.80             | 0.87                                       | -0.051        | 0.225        | 0.231                                         |
| IPSL-CM5B-LR                | 1           | 0.955        | 0.840        | 50.21             | 2.18                                       | 0.199         | -0.127       | 0.236                                         |
| <b>MIROC-ESM</b>            | <b>1</b>    | <b>0.973</b> | <b>0.939</b> | <b>46.86</b>      | <b>1.36</b>                                | <b>0.636</b>  | <b>0.123</b> | <b>0.648</b>                                  |
| <b>MIROC5</b>               | <b>3</b>    | <b>0.963</b> | <b>0.989</b> | <b>45.33</b>      | <b>1.87</b>                                | <b>0.450</b>  | <b>0.622</b> | <b>0.768</b>                                  |
| MPI-ESM-LR                  | 3           | 0.988        | 1.028        | 44.20             | 0.59                                       | -0.019        | 0.000        | 0.019                                         |
| MPI-ESM-MR                  | 1           | 0.965        | 1.064        | 43.16             | 1.76                                       | 0.201         | 0.347        | 0.401                                         |
| MRI-CGCM3                   | 1           | 0.962        | 0.927        | 47.25             | 1.90                                       | 0.241         | 0.158        | 0.288                                         |
| <b>NorESM1-M</b>            | <b>1</b>    | <b>0.953</b> | <b>1.038</b> | <b>43.88</b>      | <b>2.34</b>                                | <b>0.431</b>  | <b>0.344</b> | <b>0.552</b>                                  |
| <b>Multi-model mean</b>     | <b>29</b>   | <b>0.999</b> | <b>1.043</b> | <b>43.79</b>      | <b>0.04</b>                                | <b>0.783</b>  | <b>0.171</b> | <b>0.801</b>                                  |
